# Supplementary material
Source: HighWire-hosted journal article supplement (https://erj.ersjournals.com/content/58/5/2004173)
Supplement: inline-supplementary-material-13 [file inline-supplementary-material-13.pdf]

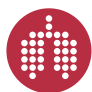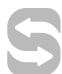

SHAREABLE PDF

# European Respiratory Society clinical practice guidelines for the diagnosis of asthma in children aged 5–16 years

Erol A. Gaillard<sup>1,2</sup>, Claudia E. Kuehni<sup>3,4</sup>, Steve Turner<sup>5</sup>, Myrofora Goutaki<sup>3,4</sup>, Karl A. Holden<sup>1</sup>, Carmen C.M. de Jong<sup>3</sup>, Christiane Lex<sup>6</sup>, David K.H. Lo<sup>1,2</sup>, Jane S. Lucas<sup>7,8</sup>, Fabio Midulla<sup>9</sup>, Rebeca Mozun<sup>3</sup>, Giorgio Piacentini<sup>10</sup>, David Rigau<sup>11</sup>, Bart Rottier<sup>12,13,14</sup>, Mike Thomas<sup>15</sup>, Thomy Tonia<sup>3</sup>, Jakob Usemann<sup>16,17</sup>, Ozge Yilmaz<sup>18</sup>, Angela Zacharasiewicz<sup>19</sup> and Alexander Moeller<sup>17</sup>

<sup>1</sup>Dept of Respiratory Sciences, Leicester NIHR Biomedical Research Centre (Respiratory theme), University of Leicester, Leicester, UK. <sup>2</sup>Dept of Paediatric Respiratory Medicine, Leicester Children's Hospital, University Hospitals Leicester, Leicester, UK. <sup>3</sup>Institute of Social and Preventive Medicine, University of Bern, Bern, Switzerland. <sup>4</sup>Paediatric Respiratory Medicine, Children's University Children's Hospital, University of Bern, Bern, Switzerland. <sup>5</sup>Child Health, University of Aberdeen, Aberdeen, UK. <sup>6</sup>Dept of Paediatric Cardiology, Intensive Care Medicine and Neonatology with Paediatric Pulmonology, University Medical Center Goettingen, Goettingen, Germany. <sup>7</sup>Primary Ciliary Dyskinesia Centre, National Institute for Health Research, Southampton Biomedical Research Centre, University Hospital Southampton NHS Foundation Trust, Southampton, UK. <sup>8</sup>University of Southampton Faculty of Medicine, School of Clinical and Experimental Medicine, Southampton, UK. <sup>9</sup>Maternal-Science Dept, Sapienza University of Rome, Rome, Italy. <sup>10</sup>Dept of Surgical Sciences, Dentistry, Gynaecology and Pediatrics, University of Verona, Verona, Italy. <sup>11</sup>Iberoamerican Cochrane Centre, Barcelona, Spain. <sup>12</sup>Dept of Paediatric Pulmonology and Paediatric Allergy, University Medical Centre Groningen, Beatrix Children's Hospital, University of Groningen, Groningen, The Netherlands. <sup>13</sup>University Medical Centre Groningen, University of Groningen, Groningen, Groningen, The Netherlands. <sup>14</sup>Groningen Research Institute for Asthma and COPD, (GRIAC), Groningen, The Netherlands. <sup>15</sup>Primary Care, Population Sciences and Medical Education (PPM), Faculty of Medicine, University of Southampton, Southampton, UK. <sup>16</sup>University Children's Hospital Basel (UKBB), Basel, Switzerland. <sup>17</sup>Division of Respiratory Medicine, University Children's Hospital Zurich and Childhood Research Center, Zurich, Switzerland. <sup>18</sup>Dept of Pediatric Allergy and Pulmonology, Celal Bayar University, Manisa, Turkey. <sup>19</sup>Dept of Pediatrics and Adolescent Medicine, Wilhelminenspital, Teaching Hospital of the University of Vienna, Vienna, Austria.

Corresponding author: Erol A. Gaillard (eag15@leicester.ac.uk)

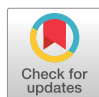

Shareable abstract (@ERSpublications)

**International ERS clinical practice guidelines recommend a combination of objective tests including spirometry, bronchodilator reversibility, fraction of exhaled nitric oxide and bronchial challenge testing to diagnose asthma in children aged 5–16 years** <https://bit.ly/32cRjsy>

**Cite this article as:** Gaillard EA, Kuehni CE, Turner S, *et al.* European Respiratory Society clinical practice guidelines for the diagnosis of asthma in children aged 5–16 years. *Eur Respir J* 2021; 58: 2004173 [DOI: 10.1183/13993003.04173-2020].

This single-page version can be shared freely online.

Copyright ©The authors 2021. For reproduction rights and permissions contact [permissions@ersnet.org](mailto:permissions@ersnet.org)

This article has supplementary material available from [erj.ersjournals.com](http://erj.ersjournals.com)

Received: 12 Nov 2020  
Accepted: 15 March 2021

## Abstract

**Background** Diagnosing asthma in children represents an important clinical challenge. There is no single gold-standard test to confirm the diagnosis. Consequently, over- and under-diagnosis of asthma is frequent in children.

**Methods** A task force supported by the European Respiratory Society has developed these evidence-based clinical practice guidelines for the diagnosis of asthma in children aged 5–16 years using nine Population, Intervention, Comparator and Outcome (PICO) questions. The task force conducted systematic literature searches for all PICO questions and screened the outputs from these, including relevant full-text articles. All task force members approved the final decision for inclusion of research papers. The task force assessed the quality of the evidence using the Grading of Recommendations, Assessment, Development and Evaluation (GRADE) approach.

**Results** The task force then developed a diagnostic algorithm based on the critical appraisal of the PICO questions, preferences expressed by lay members and test availability. Proposed cut-offs were determined based on the best available evidence. The task force formulated recommendations using the GRADE Evidence to Decision framework.

**Conclusion** Based on the critical appraisal of the evidence and the Evidence to Decision framework, the task force recommends spirometry, bronchodilator reversibility testing and exhaled nitric oxide fraction as first-line diagnostic tests in children under investigation for asthma. The task force recommends against diagnosing asthma in children based on clinical history alone or following a single abnormal objective test. Finally, this guideline also proposes a set of research priorities to improve asthma diagnosis in children in the future.
